Title : PHARMACOKINETICS OF FENTANYL (F) DURING CONTINUOUS INFUSION IN CRITICALLY ILL PATIENTS

Authors : M. Alazia, M.D., J.C. Levron, M.D., C. Guidon, M.D., G. François, M.D.

Affiliation : Département d'Anesthésie-Réanimation, Groupe Hospitalier Adultes LA TIMONE, Rue Saint-Pierre, 13385 MARSEILLE Cédex 5 (FRANCE)

**INTRODUCTION** : F is a narcotic agent widely used in intensive care units to provide sedation and adaptation to mechanical ventilation. Under these conditions, F is infused at a constant rate for very long periods, requiring high total doses (2). At present there are few data available about the pharmacokinetics of F in this clinical use. The aim of this study was to evaluate the pharmacokinetic parameters of F after continuous perfusion for over three days.

**METHODS AND MATERIALS** : Six critically ill patients (4 men, 2 women, age  $44 \pm 15$  years) without renal, cardiac, or hepatic disease received a constant infusion of F ( $500 \mu\text{g}\cdot\text{h}^{-1} = 7.55 \pm 1.6 \mu\text{g}\cdot\text{kg}^{-1}\cdot\text{h}^{-1}$ ) for a minimum period of 72 h ( $119 \pm 77$  h). Venous blood was sampled every 24 h during the infusion and at : 5, 10, 15, 20, 30, 45, 60, 90 min. and at 2, 2.5, 4, 5, 5.5, 8, 10, 12, 16, 24 and 36 h. Plasma was separated from the blood by centrifugation and stored at  $-20^\circ\text{C}$ . until assay F plasma concentrations were determined in duplicate by radioimmunoassay. The following model independent pharmacokinetic parameters were calculated using the habitual equations : elimination half-life ( $t_{1/2\beta}$ ), total volume of distribution ( $Vd\beta$ ), total body clearance (Cl), and steady state plasma concentrations ( $C_{ss}$ ). Plasma protein binding was measured by equilibrium dialysis at  $37^\circ\text{C}$  for 4 h ; plasma samples were incubated with  $\text{F}^{3\text{H}}$  at a total concentration of  $10 \text{ ng}\cdot\text{ml}^{-1}$  and dialyzed against phosphate buffer at a pH of 7.4. Hematocrit (Ht) and blood protid levels were determined each day.

**RESULTS** : They are summarized in tables I and II (mean  $\pm$  standard deviation).

**DISCUSSION** : The comparison of these results with other pharmacokinetic F studies is difficult because of the long duration of infusion and the physiological state of critically ill patients. All the data available concern bolus or short duration infusion ( $< 6$  h), except for one case (5). In our study, the terminal half-life measured was prolonged significantly ( $t_{1/2\beta} = 25$  h), being approximately two times longer than the maximum values observed in surgical patients receiving a simple dose of  $500 \mu\text{g}$  (3) or a constant infusion of  $0.3 \mu\text{g}\cdot\text{kg}^{-1}\cdot\text{min}^{-1}$  for 4 h (4) ; in these studies terminal half-life ranged between 2.5 and 1.1 hours. The augmentation of  $t_{1/2\beta}$  in critically ill patients is due to the enlargement of the total volume of distribution, while total clearance did not differ from other studies (3,4). This change in  $Vd\beta$  has also been reported in critically ill patients (1,5). The explanation for this phenomenon could be the enhanced penetration of F into highly perfused tissues. Two hypotheses can be proposed : 1/. Low hematocrit values (29 %) can decrease the fixation of F in erythrocytes (40 % in normal subjects) and facilitate its diffusion outside the blood compartment.

However, plasma protein-binding is not notably different from the normal values (80.9 % versus 85 % in normal subjects). In addition, blood protid levels ( $61.6 \text{ g}\cdot\text{l}^{-1}$ ) remain normal. These results do not explain the increase in the plasmatic free fraction of F. 2/. Numerous associated drugs used in intensive care units are capable of interfering with F pharmacokinetics. Cimetidine, when administered to this kind of patient ( $1.2 \text{ g}\cdot 24 \text{ h}^{-1}$ ) could prolong the terminal half-life of F but this interaction is not clear (1). Dopamine was used at efficient doses producing an increase in regional blood flow leading to an increase in F tissular distribution.

**CONCLUSIONS** : In critically ill patients, a long duration F infusion produces a larger total volume of distribution and a longer elimination half-life than in normal anesthetized patients. In this study, it is difficult to determine a therapeutic model due to the great interindividual variations in pharmacokinetics.

Table I : pharmacokinetic parameters  $\bar{X} \pm \text{SD}$

| $t_{1/2\beta}$<br>(h) | $Vd\beta$<br>( $\text{l}\cdot\text{kg}^{-1}$ ) | Cl<br>( $\text{ml}\cdot\text{kg}^{-1}\cdot\text{mn}^{-1}$ ) | $C_{ss}$<br>( $\text{ng}\cdot\text{ml}^{-1}$ ) |
|-----------------------|------------------------------------------------|-------------------------------------------------------------|------------------------------------------------|
| 25.03                 | 25.1                                           | 12.03                                                       | 9.75                                           |
| $\pm 16.2$            | $\pm 17.6$                                     | $\pm 4.44$                                                  | $\pm 2.75$                                     |
| min.-max              | min.-max                                       | min.-max                                                    | min.-max                                       |
| 10 - 56               | 14.1-58.4                                      | 7.3-20.1                                                    | 5.5-12.5                                       |

Table II : biological parameters  $\bar{X} \pm \text{SD}$

| plasma protein-binding<br>( $\text{F}=10\text{ng}\cdot\text{ml}^{-1}$ ) | Hematocrit<br>(%) | Blood protid<br>( $\text{g}\cdot\text{l}^{-1}$ ) |
|-------------------------------------------------------------------------|-------------------|--------------------------------------------------|
| $80.88 \pm 2.38$                                                        | $29.3 \pm 3.3$    | $61.58 \pm 6.57$                                 |

**REFERENCES**

- D'ENFERT J., LEVRON J.C., STRUMZA P., FLAISLER B, CONSEILLER C. Recherche d'une influence de la Cimetidine sur la pharmacocinétique du Fentanyl chez les malades de réanimation. XXIX<sup>e</sup> Congrès Français d'Anesthésie-Réanimation. C46. p.173. Lille 1983. 22-24 Sept.
- DUVALDESTIN P., CAMELLA J.P., MARTY J. Pharmacocinétique des médicaments utilisés pour la sédation en réanimation. Réanimation et Médecine d'Urgence, Expansion Scientifique Française p.159-172. 1983.
- HENGSTMANN J.M., STOECKEL H., SCHUTTLER J. Infusion model for Fentanyl based on pharmacokinetic analysis. Br. J. Anaesth. 52, 1021-1025. 1980.
- HUG C.C., MOLDENHAUER C.C. Pharmacokinetics and dynamics of Fentanyl infusions in cardiac surgical patients. Anesthesiology. 57 A 45. 1982.
- SHAFFER A.A., WHITE P.F., SCHUTTLER J., ROSENTHAL M.H. Use of fentanyl infusion in the intensive care unit : tolerance to its anesthetic effects ? Anesthesiology 59. 245-248. 1983.
